# Supplementary material
Source: Research Square preprint supplement (doi:10.21203/rs.3.rs-8949721/v1)
Supplement: Supplementary file 1 [file 203bc5364c29455567da68ff.docx]

**Supplementary file**

**Intermittent Exotropia Control Scale**

| 5 = Constant exotropia |
| --- |
| 4 = Exotropia > 50% of the exam before dissociation |
| 3 = Exotropia < 50% of the exam before dissociation |
| 2 = No exotropia unless dissociated, recovers in > 5 seconds |
| 1 = No exotropia unless dissociated, recovers in 1–5 seconds |
| 0 = No exotropia unless dissociated, recovers in < 1 second (phoria) |

*This scale is applied to each patient for both distance and near fixation which, when combined, yields an overall control score ranging from 0 to 10. Levels 5 to 3 are assessed during an initial 30-second period of observation. Levels 2 to 0 are graded as the worst of three rapidly successive trials. An occluder is placed over the right eye for 10 seconds and then removed, measuring the length of time it takes for fusion to become re-established. The left eye is then occluded for a 10-second period and the time to re-fusion is similarly measured. A third trial of 10-second occlusion is performed, covering the eye that required the longest time to re-fuse. The worse level of control observed following the 3, 10-second periods of occlusion should be recorded for that visit. If the patient has a micro-esotropia by simultaneous prism and cover test, but exodeviation by alternate cover test, the scale applies to the exodeviation.*

**Reference**

Mohney BG, Holmes JM. An office-based scale for assessing control in intermittent exotropia. Strabismus. 2006;14:147-50.
